# Supplementary material for: A Multiscale Denoising Framework Using Detection Theory with Application to Images from CMOS/CCD Sensors
Source: MDPI journal article supplement (doi:10.3390/s19010206), 2019-01-08
Supplement: s1 [file s1]

Article

# A Multiscale Denoising Framework using Detection Theory with Application to Images from CMOS/CCD Sensors

Khuram Naveed <sup>1,\*</sup>, Shoaib Ehsan <sup>2</sup>, Klaus D. McDonald-Maier <sup>2</sup> and Naveed ur Rehman <sup>1</sup>

<sup>1</sup> Department of Electrical and Computer Engineering, COMSATS University, Park Road, Islamabad 45550, Pakistan; naveed.rehman@comsats.edu.pk

<sup>2</sup> School of Computer Science and Electronic Engineering, University of Essex, Colchester CO4 3SQ, UK; sehsan@essex.ac.uk (S.E.); kdm@essex.ac.uk (K.D.M.-M.)

\* Correspondence: khuram.naveed@comsats.edu.pk; Tel.: +92-51-9049-223

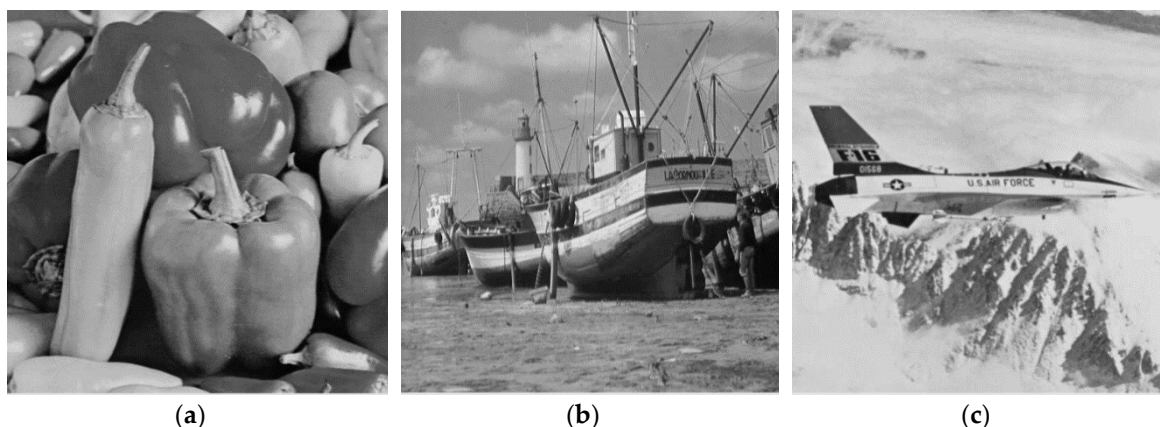

**Figure S1.** Standard input images used for performance analysis of various denoising methods in this study including (a) 'Peppers' image, (b) 'Boat' image, (c) 'Plane' image.
